# Supplementary material for: A Role for the Proteasome Alpha2 Subunit N-Tail in Substrate Processing
Source: MDPI journal article supplement (doi:10.3390/biom13030480), 2023-03-05
Supplement: s1 [file s1]

# Supplementary Information

## A Role for the Proteasome Alpha2 Subunit N-Tail in Substrate Processing

Indrajit Sahu <sup>1,\*†</sup>, Monika Bajorek <sup>2,†</sup>, Tan Xiaolin <sup>3</sup>, Madabhushi Srividya <sup>3</sup>, Daria Krutauz <sup>2</sup>, Noa Reis <sup>2</sup>, Pawel A. Osmulski <sup>3,\*</sup>, Maria E. Gaczynska <sup>3,\*</sup> and Michael H. Glickman <sup>2,\*</sup>

<sup>1</sup> Department of Cancer Biology, Dana-Farber Cancer Institute, Harvard Medical School, Boston, MA 02115, USA

<sup>2</sup> Faculty of Biology, Technion—Israel Institute of Technology, Haifa 3525433, Israel

<sup>3</sup> Department of Molecular Medicine, University of Texas Health Science Center at San Antonio, San Antonio, TX 78229, USA

\* Correspondence: indrajit\_sahu@hms.harvard.edu (I.S.); osmulski@uthscsa.edu (P.A.O.); gaczynska@uthscsa.edu (M.E.G.); glickman@technion.ac.il (M.H.G.)

† These authors contributed equally to this work.

This file contains **Supplementary Figures S1-S5** on the following pages 2-6:

**Figures:**

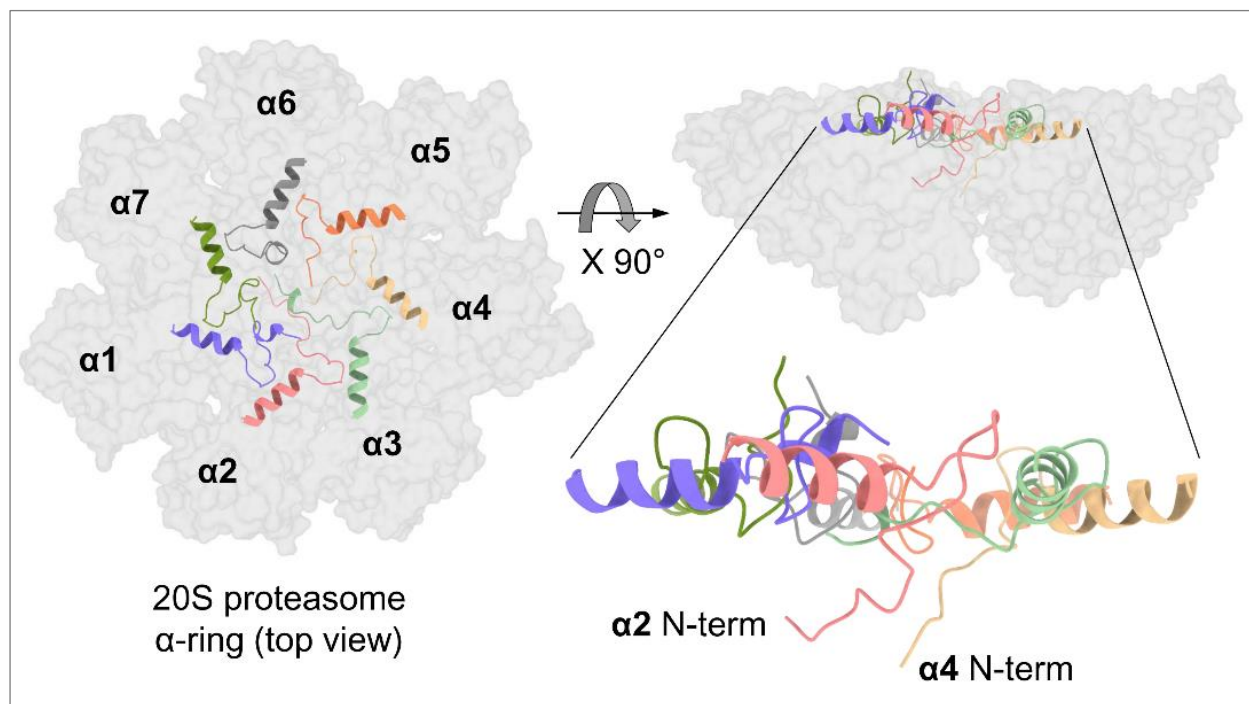

**Supplementary Figure S1: The  $\alpha$ -ring of closed 20S gate.** Position of  $\alpha$ -subunit N-termini in closed yeast 20S proteasomes (*Model PDB 1ryp*). Left: Top view of 20S-CP  $\alpha$ -ring structure showing in grey color surface contour. The N-terminal tails and the H0-helix of all  $\alpha$ -subunits ( $\alpha$  N-ring) are shown in colored cartoon. Right: The side view of the figure on left showing the downward position of  $\alpha 2$  and  $\alpha 4$  N-terminal tails.

| A             | N-Term   | YDX    | Reverse | H0 helix           |
|---------------|----------|--------|---------|--------------------|
|               |          | -motif | turn    |                    |
| Hs $\alpha$ 1 | MSRGSSAG | FDR    | HITIFSP | EGRLYQVEYAFKAINQGG |
| Hs $\alpha$ 2 | MAERG    | YSF    | SLTTFSP | SGKLVQIEYALAAVAG   |
| Hs $\alpha$ 3 | MSRR     | YDS    | RTTIFSP | EGRLYQVEYAMEAI     |
| Hs $\alpha$ 4 | MS       | YDR    | AITVFSP | DGHLFQVEYAQEAVKKG  |
| Hs $\alpha$ 5 | MFLTRSE  | YDR    | GVNTFSP | EGRLFQVEYAIEAIKL   |
| Hs $\alpha$ 6 | MFRNQ    | YDN    | DVTWSP  | QGRVHQIEYAMEAVK    |
| Hs $\alpha$ 7 | MSSIGTG  | YDL    | SASTFSP | DGRVFQVEYAMKAVE    |

  

| B          | YDX -motif |       |
|------------|------------|-------|
|            | Yeast      | Human |
| $\alpha$ 1 | YDR        | FDR   |
| $\alpha$ 2 | YSF        | YSF   |
| $\alpha$ 3 | YDS        | YDS   |
| $\alpha$ 4 | YDR        | YDR   |
| $\alpha$ 5 | YDR        | YDR   |
| $\alpha$ 6 | YDG        | YDN   |
| $\alpha$ 7 | YDL        | YDL   |

**Supplementary Figure S2: YD(X) motifs of  $\alpha$ -subunit N-termini of human proteasome.** (A) N-terminal tail sequences of human proteasome  $\alpha$ -subunits highlighting the embedded YD(X) motif. (B) Conservation of YD(X) motifs between yeast and human proteasome  $\alpha$  subunits.

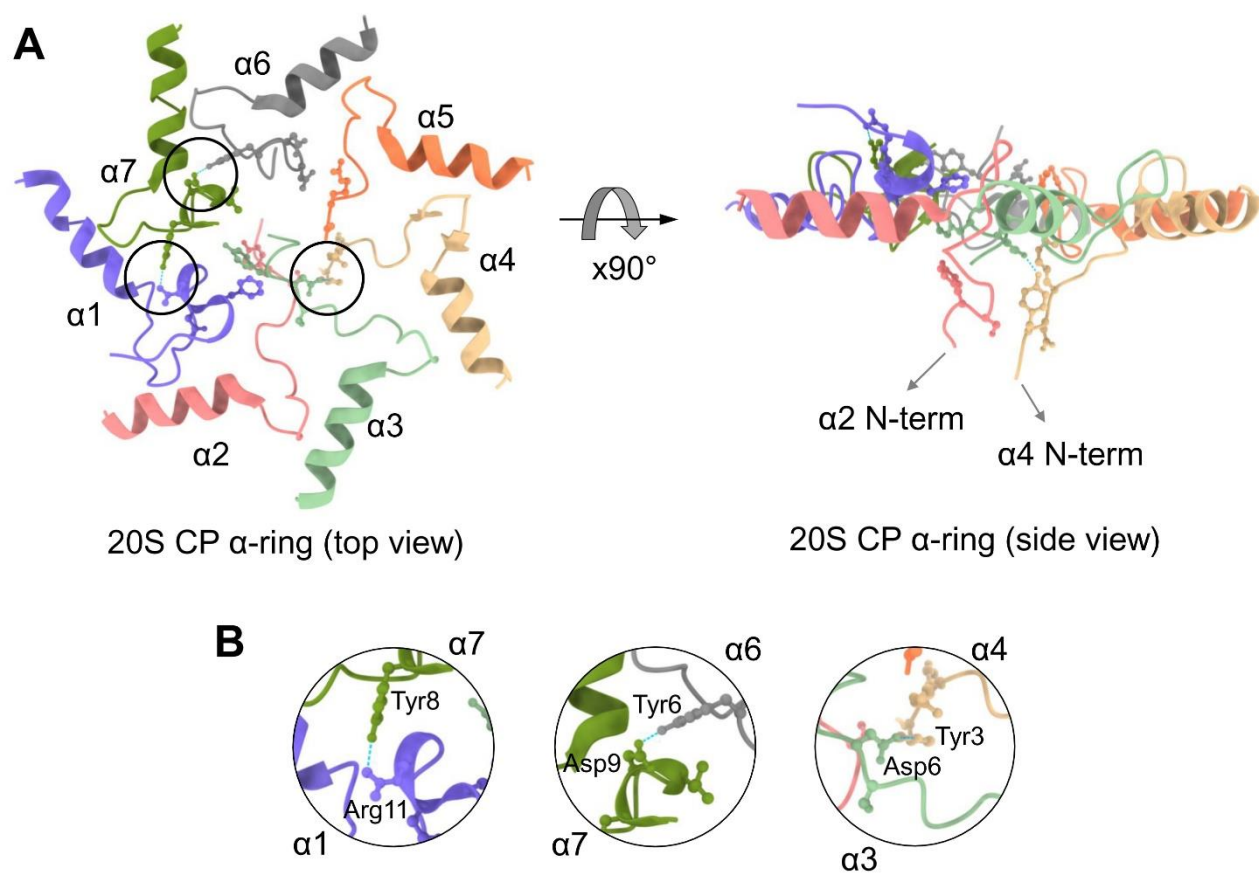

**Supplementary Figure S3: YD(X) motif Interactions in closed state human 20S proteasome. (A)**

Left: A model figure of the  $\alpha$  N-ring region in resting human 20S (pdb:7pg9) with cartoon representation. The black circle shows the hydrogen bonds between  $\alpha1$ - $\alpha7$ ,  $\alpha3$ - $\alpha4$  and  $\alpha6$ - $\alpha7$  at the YDX motifs. Right: Side view of the  $\alpha$  N-ring shows the deeper extension of  $\alpha2$  and  $\alpha4$  N-termini. The YDX motif of each  $\alpha$ -subunit tails are shown in ball-stick representation. **(B)** The zoomed in view of the hydrogen bonds between  $\alpha1D - Y\alpha7$ ,  $\alpha3D - Y\alpha4$  and  $\alpha6Y - D\alpha7$ .

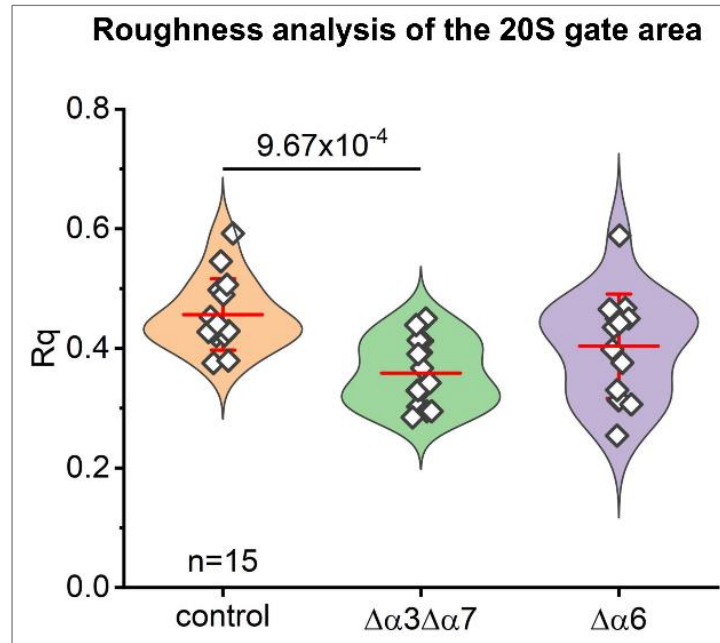

**Supplementary Figure S4: Roughness analysis of the 20S gate area.** Roughness analysis was performed on the eight-pixel  $\alpha$  face scan-lines of randomly selected single images of core particles, fifteen each from WT (control; closed),  $\alpha3\alpha7\Delta N$  (pseudo-open), and  $\alpha6\Delta N$  (closed) (NanoScope Analysis and SPIP/Scanning Probe Image Processor v. 6.013; Image Metrology, Denmark). The RMS (root mean square) values were considered a measure of the flatness of the gate area.

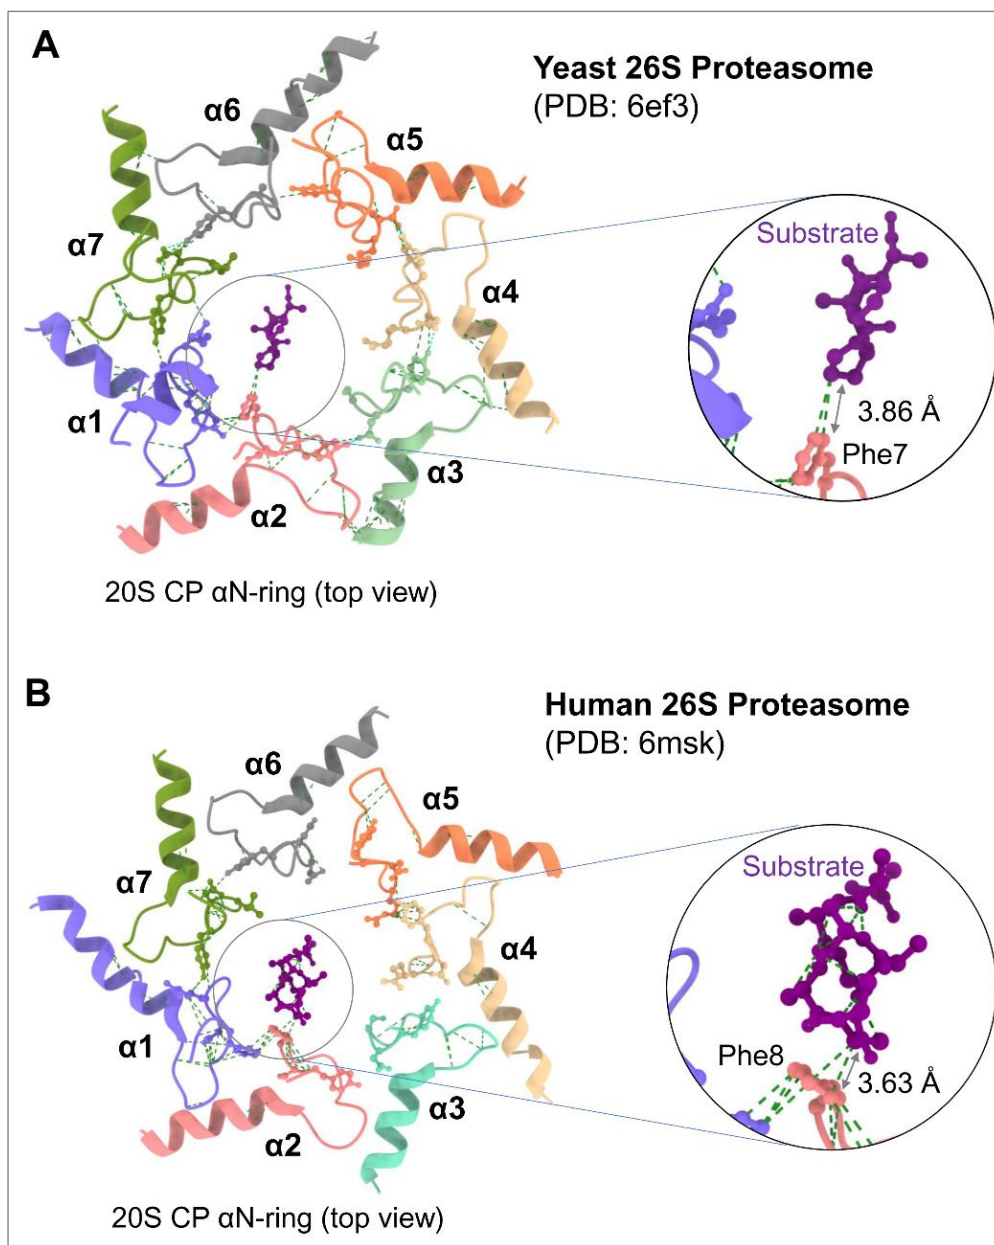

**Supplementary Figure S5: Substrate interaction with Phe residue in N-terminal tail of the  $\alpha 2$  subunit.** Cartoon view models of the  $\alpha$  N-ring of Yeast proteasome (**A**) and Human proteasome (**B**) show a substrate polypeptide (in purple ball & stick model) interacting with the Phe residue (in pink ball & stick model) of the corresponding YDF sequence of  $\alpha 2$  subunits. Each YD(X) motif of the different  $\alpha$  subunits is shown in ball & stick models. The green dash lines represent the Van-der-Wall interactions between atoms within specific residues measured by Chimera X with interaction parameters as “Find pairs of atoms with VDW overlap”  $\geq 0.30$  Å. The blue dash lines represent the H-bonds between the Y and D residues of adjacent YD(X) motifs.
